# Supplementary material for: Assessment of the Biological Impact of SARS-CoV-2 Genetic Variation Using an Authentic Virus Neutralisation Assay with Convalescent Plasma, Vaccinee Sera, and Standard Reagents
Source: MDPI journal article supplement (doi:10.3390/v15030633), 2023-02-25
Supplement: s1 [file s1]

**Table S1** – Summary of neutralisation titres in a SARS-CoV-2 ancestral pseudotyped lentivirus virus (PSV) and focus-reduction (FRNT) neutralisation assay for a panel of 11 pre-Alpha convalescent plasma.

| <b>Sample ID</b> | <b>Harvest date</b> | <b>PSV (IC<sub>90</sub>)</b> | <b>FRNT (ND<sub>50</sub>)</b> |
|------------------|---------------------|------------------------------|-------------------------------|
| NIBSC 7          | May 2020            | 2321                         | 13554                         |
| NIBSC 24         | May 2020            | 1891                         | 2684                          |
| NIBSC 31         | June 2020           | 351                          | 2033                          |
| NIBSC 32         | May 2020            | 1137                         | 4181                          |
| NIBSC 47         | June 2020           | 101                          | 773                           |
| NIBSC 61         | May 2020            | 352                          | 2238                          |
| NIBSC 78         | June 2020           | 365                          | 5309                          |
| NIBSC 80         | June 2020           | 116                          | 3122                          |
| NIBSC 82         | June 2020           | 345                          | 2889                          |
| NIBSC 83         | June 2020           | 77                           | 2832                          |
| NIBSC 86         | June 2020           | 88                           | 1920                          |

**Table S2** – Summary of geometric mean neutralisation titres from a focus-reduction assay (FRNT) for a panel of 11 pre-Alpha convalescent plasma against SARS-CoV-2 variants and their fold-changes relative to ancestral virus. Results are combined (geometric mean) from two independent laboratories and ordered by date of emergence.

| Variant             | Geometric mean of titres (ND <sub>50</sub> ) | Fold-change relative to ancestral virus | 95% confidence intervals |
|---------------------|----------------------------------------------|-----------------------------------------|--------------------------|
| Ancestral           | 2,940                                        | NA                                      | 1830 – 4720              |
| Alpha               | 563                                          | 5.2*                                    | 359 – 883                |
| Beta                | 106                                          | 27.6*                                   | 69.5 – 162               |
| Gamma               | 2,690                                        | 1.1                                     | 1780 – 4070              |
| Gamma - FC          | 750                                          | 3.9*                                    | 565 – 996                |
| Alpha + E484K       | 522                                          | 5.6*                                    | 360 – 756                |
| Zeta - FC           | 73.6                                         | 39.9*                                   | 43.1 – 126               |
| Zeta - BEI          | 255                                          | 11.5*                                   | 146 – 444                |
| Kappa               | 208                                          | 14.1*                                   | 120 – 363                |
| Delta               | 318                                          | 9.2*                                    | 149 – 679                |
| Delta - AY.1        | 310                                          | 9.5*                                    | 166 – 580                |
| Delta - AY.4.2      | 338                                          | 8.7*                                    | 156 – 735                |
| Lambda              | 350                                          | 8.4*                                    | 172 – 711                |
| Mu                  | 90.2                                         | 32.5*                                   | 60.5 – 134               |
| Omicron - BA.1      | 24.5                                         | 120*                                    | 21.4 – 28.0              |
| Omicron - BA.2      | 47.3                                         | 62.0*                                   | 29.9 – 74.8              |
| Omicron - BA.1.1    | 23.8                                         | 123*                                    | 20.1 – 28.2              |
| Recombinant - XF    | 24.8                                         | 118*                                    | 19.8 – 31.1              |
| Omicron - BA.2.12.1 | 44.0                                         | 66.7*                                   | 27 – 71.9                |
| Omicron - BA.4      | 31.5                                         | 93.2*                                   | 22.2 – 44.6              |
| Omicron - BA.5.2.1  | 31.8                                         | 92.2*                                   | 23.1 – 43.9              |

Significant difference ( $p < 0.05$ ), as determined by a two-way ANOVA with Tukey's HSD post hoc test are indicated by \*.

**Table S3** – Summary of geometric mean neutralisation titres from a focus-reduction assay (FRNT) for a panel of 10 triple vaccinated human sera against SARS-CoV-2 variants and their fold-changes relative to ancestral virus. Results are ordered by date of variant emergence.

| Variant             | Geometric mean of titres (ND <sub>50</sub> ) | Fold-change relative to ancestral virus | 95% confidence intervals |
|---------------------|----------------------------------------------|-----------------------------------------|--------------------------|
| Ancestral           | 5,230                                        | NA                                      | 3444 – 7930              |
| Omicron - BA.1      | 182                                          | 28.7*                                   | 97.4 – 340               |
| Omicron - BA.2      | 199                                          | 26.2*                                   | 142 – 280                |
| Omicron - BA.1.1    | 144                                          | 36.4*                                   | 93.4 – 221               |
| Recombinant - XE    | 162                                          | 32.3*                                   | 114 – 229                |
| Recombinant - XF    | 151                                          | 34.5*                                   | 89.5 – 256               |
| Omicron - BA.2.12.1 | 166                                          | 31.4*                                   | 115 – 241                |
| Omicron - BA.4      | 104                                          | 50.2*                                   | 71.1 – 152               |
| Omicron - BA.5.2.1  | 65.4                                         | 79.9*                                   | 43.2 – 98.8              |
| Omicron - BA.2.75.3 | 168                                          | 31.0*                                   | 96.3 – 295               |

Significant difference ( $p < 0.05$ ), as determined by a two-way ANOVA with Tukey's HSD post hoc test are indicated by \*.

**Table S4** – Summary of geometric mean neutralisation titres from a focus-reduction assay (FRNT) for a panel of 9 triple vaccinated human sera (excluding the participant with a breakthrough infection) against SARS-CoV-2 variants and their fold-changes relative to ancestral virus. Results are ordered by date of variant emergence.

| Variant             | Geometric mean of titres (ND <sub>50</sub> ) | Fold-change relative to ancestral virus | 95% confidence intervals |
|---------------------|----------------------------------------------|-----------------------------------------|--------------------------|
| Ancestral           | 4580                                         | NA                                      | 3280 – 6400              |
| Omicron - BA.1      | 157                                          | 29.2*                                   | 86.0 – 286               |
| Omicron - BA.2      | 182                                          | 25.2*                                   | 134 – 248                |
| Omicron - BA.1.1    | 135                                          | 34.0*                                   | 84.9 – 214               |
| Recombinant - XE    | 147                                          | 31.2*                                   | 108 – 199                |
| Recombinant - XF    | 131                                          | 34.9*                                   | 81.8 – 211               |
| Omicron - BA.2.12.1 | 158                                          | 28.9*                                   | 106 – 237                |
| Omicron - BA.4      | 95.9                                         | 47.8*                                   | 65.6 – 140               |
| Omicron - BA.5.2.1  | 57.2                                         | 80.1*                                   | 41.4 – 79.0              |
| Omicron - BA.2.75.3 | 140                                          | 32.8*                                   | 92.1 – 212               |

Significant difference ( $p < 0.05$ ), as determined by a two-way ANOVA with Tukey's HSD post hoc test are indicated by \*.

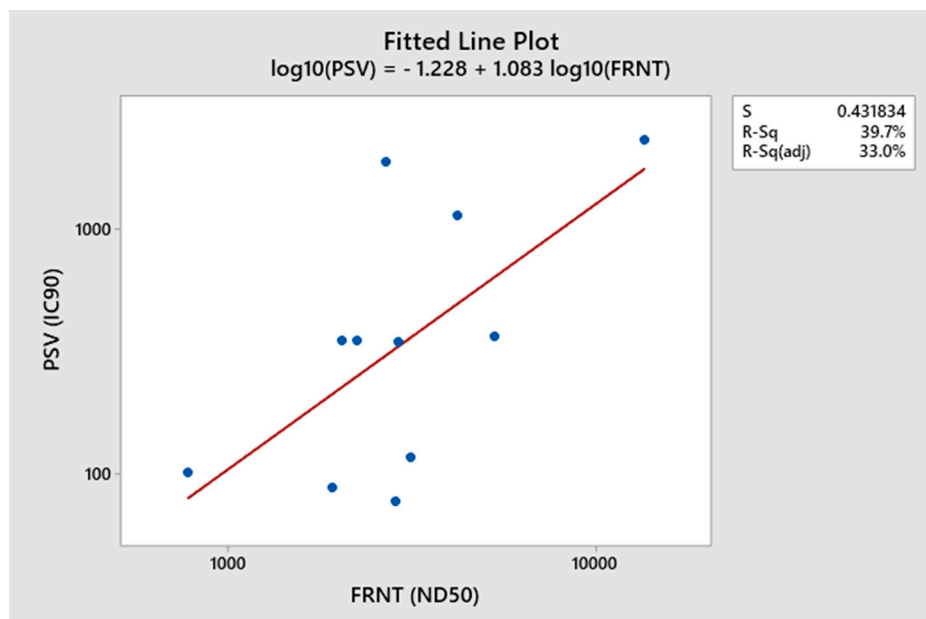

**Figure S1. Regression analysis of neutralisation titres from an ancestral SARS-CoV-2 pseudotyped assay and focus-reduction neutralisation test (FRNT) for a panel of 11 pre-Alpha convalescent plasma**

Regression analysis of 11 pre-Alpha convalescent plasma used for variant escape assessment showing the correlation (Pearson's  $r=0.63$ ;  $p=0.038$ ) between the two assays.

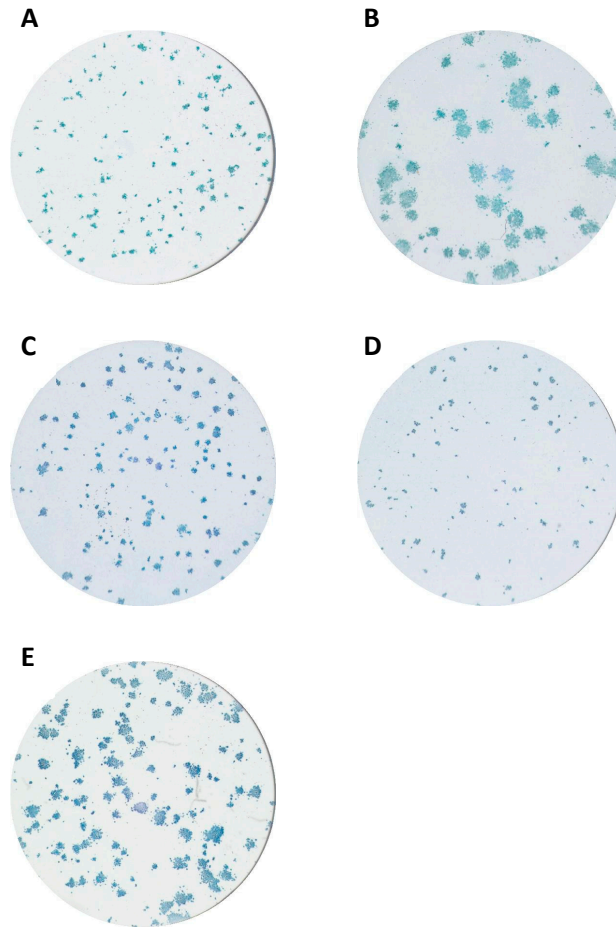

**Figure S2. Foci morphology differences between SARS-CoV-2 variants used in this study**

Vero-E6 cells infected with SARS-CoV-2 ancestral (A), Beta (B), Gamma (C) Omicron BA.1 (D) and Omicron BA.5 (E) variants as part of a focus forming assay with authentic virus. Immunostaining was performed with an anti-RBD antibody for authentic and Beta or anti-NC antibody for Omicron. Post-infection fixation time was optimised to 24hr (Ancestral), 20hr (Beta and Gamma), 26hr (Omicron BA.1) or 22h (Omicron BA.5).
